# Supplementary material for: Transcriptome analysis revealed the mechanism of exogenous silicon alleviating allelopathic inhibition of cinnamic acid on soybean seedlings
Source: Research Square preprint supplement (doi:10.21203/rs.3.rs-7165248/v1), 2025-08-26
Supplement: Supplementary file 1 [file 795646d873c9b127dd6eb51f.xlsx]

## Sheet: Table.S1
Table S1. Primers used in this study.
Gene ID	Primers
	Forward sequence	Reverse sequence
JHK84_030377	CACCACCTGACGAAGGACAAC	AAGCAAGGAGTAACCAGTGAAGAC
JHK84_041795	TTCTCAACCTCAAGACCACATAATAGC	ACAAGAGCAGATAGAGCAATGAACC
JHK84_042462	GGCTATTAGAGGAGGTGGTGGAG	TGGCAGTGACATTCGTTTCAAGAG
JHK84_056629	TCATATTGTAAGGCAGCACGGAAG	AAGCCATTGAGGTGATGTTCTAAGAG
JHK84_039812	ACACAGTCAGTTCATCTTCTTCTTCTG	GCATCACATCCCTCCACAAAGC
JHK84_036687	GGGAACTGAAGAAGGAATGGGAAAC	CTAACTTTGGCACCACTCTCACTC
JHK84_036193	CGTATTGTCTTCTCGGTGGATGG	AGTATATCCTCATTGCCTGGTTCTTG
JHK84_046669	GAGGTGGACTTGTGAAGACAGATTG	GGACGCAGGCATTGGCATTG
JHK84_046138	AGGGATAGATTGTTGAGGTTGGTTAAG	AAGGAGAAGTGTTGGTGTTGGATTC
JHK84_037967	GGCTTCCGTCAGTGTCCTTTG	TCCATCCTTCTCCACCAGTGTATAG
JHK84_039404	GTTGCCGCACGCCCAAAC	GTAAGCCGCCGACTTCTTCTTC
JHK84_036297	GGACTTGCCCGTGCTTCTTG	GTTATTCTCCGCCACCATCTCATC
GmAct	GTGAGCCACCAGTTCCCAT	TAAATCACGGCCAGCAAGGT
GmCYP2	CAAAAACCCTGTCACGCAGT	CACTTTCTCTCAAGGGCACCA

## Sheet: Table.S2
Table S2. Components of qRT-PCR
Reagent	Volume (μL)
Template cDNA	1
10μM Primer (Forward+Reverse)	0.8
Taq SYBR green Qpcr Premix	10
Nuclease-Free Water	8.2
Total volume	20

## Sheet: Table.S3
Table S3. Based on the GO enrichments analysis of the annotated DEGs among three treatments.
ID	Description	pvalue	qvalue	Count	Group
GO:0009698	phenylpropanoid metabolic process	1.02441992852013e-18	2.07342593532474e-15	87	CA-2d_vs_CK-2d
GO:0042744	hydrogen peroxide catabolic process	2.4699133487554e-18	2.49955230894047e-15	56	CA-2d_vs_CK-2d
GO:0016684	oxidoreductase activity, acting on peroxide as acc...	3.62667431361729e-17	2.94848621697086e-14	64	CA-2d_vs_CK-2d
GO:0009699	phenylpropanoid biosynthetic process	8.04637060867205e-17	4.02653770493371e-14	73	CA-2d_vs_CK-2d
GO:0042743	hydrogen peroxide metabolic process	1.14725251260834e-16	4.02653770493371e-14	64	CA-2d_vs_CK-2d
GO:0007043	cell-cell junction assembly	1.19363765956533e-16	4.02653770493371e-14	14	CA-2d_vs_CK-2d
GO:0034329	cell junction assembly	1.19363765956533e-16	4.02653770493371e-14	14	CA-2d_vs_CK-2d
GO:0036294	cellular response to decreased oxygen levels	8.39748121595654e-16	2.12456274763701e-13	68	CA-2d_vs_CK-2d
GO:0071453	cellular response to oxygen levels	8.39748121595654e-16	2.12456274763701e-13	68	CA-2d_vs_CK-2d
GO:0004601	peroxidase activity	5.77494416273049e-16	2.34751480214994e-13	61	CA-2d_vs_CK-2d
GO:0004857	enzyme inhibitor activity	1.47424606530004e-15	3.9952068369631e-13	68	CA-2d_vs_CK-2d
GO:0044550	secondary metabolite biosynthetic process	5.16489380076376e-15	1.16152722808287e-12	82	CA-2d_vs_CK-2d
GO:0071456	cellular response to hypoxia	6.32200360504266e-15	1.27957352966063e-12	66	CA-2d_vs_CK-2d
GO:0015074	DNA integration	2.45438800061273e-14	4.51607392112741e-12	34	CA-2d_vs_CK-2d
GO:0048226	Casparian strip	4.64441480884265e-14	1.1982590206814e-11	21	CA-2d_vs_CK-2d
GO:0036294	cellular response to decreased oxygen levels	4.708107912546e-25	3.91714578323827e-22	61	CA-7d_vs_CK-7d
GO:0071453	cellular response to oxygen levels	4.708107912546e-25	3.91714578323827e-22	61	CA-7d_vs_CK-7d
GO:0071456	cellular response to hypoxia	1.70318952179983e-24	9.44702454758303e-22	60	CA-7d_vs_CK-7d
GO:0036293	response to decreased oxygen levels	1.23916523939803e-21	5.15492739589579e-19	63	CA-7d_vs_CK-7d
GO:0070482	response to oxygen levels	1.62948981255174e-21	5.4229420961722e-19	63	CA-7d_vs_CK-7d
GO:0001666	response to hypoxia	3.08705059308468e-21	8.56142031148819e-19	62	CA-7d_vs_CK-7d
GO:0009611	response to wounding	1.70233996136033e-13	4.04670527957656e-11	56	CA-7d_vs_CK-7d
GO:0009877	nodulation	3.45883309029175e-13	7.19437282780684e-11	27	CA-7d_vs_CK-7d
GO:2000022	regulation of jasmonic acid mediated signaling pat...	1.0296958918205e-11	1.90379329332146e-09	24	CA-7d_vs_CK-7d
GO:0010200	response to chitin	1.41792786879302e-10	2.35943197367159e-08	16	CA-7d_vs_CK-7d
GO:0004857	enzyme inhibitor activity	4.81578235095132e-11	3.05802179285409e-08	40	CA-7d_vs_CK-7d
GO:0004867	serine-type endopeptidase inhibitor activity	1.18524196487593e-10	3.76314323848108e-08	13	CA-7d_vs_CK-7d
GO:0004866	endopeptidase inhibitor activity	2.60078840546319e-09	4.12875159367282e-07	16	CA-7d_vs_CK-7d
GO:0030414	peptidase inhibitor activity	2.60078840546319e-09	4.12875159367282e-07	16	CA-7d_vs_CK-7d
GO:0061135	endopeptidase regulator activity	4.19226766367799e-09	5.32417993287105e-07	16	CA-7d_vs_CK-7d
GO:0042545	cell wall modification	7.84483980298697e-19	1.3822607732863e-15	56	CASi-2d_vs_CA-2d
GO:0003964	RNA-directed DNA polymerase activity	4.33449313789531e-18	3.11216607300883e-15	34	CASi-2d_vs_CA-2d
GO:0015074	DNA integration	1.27755981134185e-17	1.12553019379217e-14	33	CASi-2d_vs_CA-2d
GO:0004857	enzyme inhibitor activity	6.34570316819496e-17	2.27810743738199e-14	58	CASi-2d_vs_CA-2d
GO:0016684	oxidoreductase activity, acting on peroxide as acc...	1.85125077490619e-16	4.43066018794215e-14	52	CASi-2d_vs_CA-2d
GO:0004601	peroxidase activity	2.6217901159861e-16	4.70611325819504e-14	51	CASi-2d_vs_CA-2d
GO:0042744	hydrogen peroxide catabolic process	2.18978553053355e-16	1.08949993886759e-13	45	CASi-2d_vs_CA-2d
GO:0007043	cell-cell junction assembly	3.09165703424402e-16	1.08949993886759e-13	13	CASi-2d_vs_CA-2d
GO:0034329	cell junction assembly	3.09165703424402e-16	1.08949993886759e-13	13	CASi-2d_vs_CA-2d
GO:0048226	Casparian strip	1.15010259383208e-15	2.18519492828095e-13	20	CASi-2d_vs_CA-2d
GO:0009531	secondary cell wall	5.07655144822497e-14	4.82272387581372e-12	20	CASi-2d_vs_CA-2d
GO:0042743	hydrogen peroxide metabolic process	2.32685149046382e-14	6.83318721032876e-12	50	CASi-2d_vs_CA-2d
GO:0009698	phenylpropanoid metabolic process	3.36174945315386e-14	8.46200362351015e-12	64	CASi-2d_vs_CA-2d
GO:0016209	antioxidant activity	3.55394195762574e-13	5.10346065115057e-11	52	CASi-2d_vs_CA-2d
GO:0044550	secondary metabolite biosynthetic process	2.61650707360648e-13	5.76285682961827e-11	64	CASi-2d_vs_CA-2d
GO:0004857	enzyme inhibitor activity	6.53635806825735e-16	3.79108767958926e-13	44	CASi-2d_vs_CK-2d
GO:0004867	serine-type endopeptidase inhibitor activity	3.26180449911551e-14	9.45923304743499e-12	15	CASi-2d_vs_CK-2d
GO:0004866	endopeptidase inhibitor activity	2.17433921545235e-12	3.15279186240591e-10	18	CASi-2d_vs_CK-2d
GO:0030414	peptidase inhibitor activity	2.17433921545235e-12	3.15279186240591e-10	18	CASi-2d_vs_CK-2d
GO:0061135	endopeptidase regulator activity	3.84104702062189e-12	4.4556145439214e-10	18	CASi-2d_vs_CK-2d
GO:0061134	peptidase regulator activity	6.6406769490671e-12	6.41932105076487e-10	18	CASi-2d_vs_CK-2d
GO:0042743	hydrogen peroxide metabolic process	1.05742314216932e-10	1.58296244382747e-07	33	CASi-2d_vs_CK-2d
GO:0016684	oxidoreductase activity, acting on peroxide as acc...	5.05052660354812e-09	4.18472204293987e-07	30	CASi-2d_vs_CK-2d
GO:0072593	reactive oxygen species metabolic process	9.65508361817094e-10	4.9163238485264e-07	42	CASi-2d_vs_CK-2d
GO:0009835	fruit ripening	9.8523524018565e-10	4.9163238485264e-07	16	CASi-2d_vs_CK-2d
GO:0004601	peroxidase activity	1.06516265047273e-08	7.72242921592727e-07	29	CASi-2d_vs_CK-2d
GO:0009873	ethylene-activated signaling pathway	3.9380220151659e-09	1.47380473917584e-06	42	CASi-2d_vs_CK-2d
GO:0071369	cellular response to ethylene stimulus	7.21940723056884e-09	2.16149052483231e-06	42	CASi-2d_vs_CK-2d
GO:0042744	hydrogen peroxide catabolic process	1.10024397525535e-08	2.74510871826209e-06	25	CASi-2d_vs_CK-2d
GO:0009877	nodulation	1.76569256029688e-08	3.77605966109205e-06	19	CASi-2d_vs_CK-2d
GO:0009521	photosystem	5.22861395860045e-50	7.99977935665868e-48	58	CASi-7d_vs_CA-7d
GO:0015979	photosynthesis	5.99907453776247e-51	8.90862568857728e-48	88	CASi-7d_vs_CA-7d
GO:0009523	photosystem II	8.33907214971328e-37	6.37939019453066e-35	43	CASi-7d_vs_CA-7d
GO:0009522	hypoxia response	1.8665796138101e-31	9.51955603043153e-30	31	CASi-7d_vs_CA-7d
GO:0019684	photosynthesis, light reaction	1.00033110460747e-22	7.42745845171049e-20	41	CASi-7d_vs_CA-7d
GO:0009765	photosynthesis, light harvesting	5.13723366923162e-19	2.54293066626965e-16	22	CASi-7d_vs_CA-7d
GO:0016168	chlorophyll binding	1.33148150277301e-15	7.21662974502973e-13	18	CASi-7d_vs_CA-7d
GO:0009538	photosystem I reaction center	8.00641445873052e-14	3.06245353046442e-12	10	CASi-7d_vs_CA-7d
GO:0009768	photosynthesis, light harvesting in photosystem I	8.89111148042388e-15	3.30082513710737e-12	14	CASi-7d_vs_CA-7d
GO:0009877	nodulation	1.42577964825187e-14	4.23456555530806e-12	24	CASi-7d_vs_CA-7d
GO:0009654	photosystem II oxygen evolving complex	1.72493259940573e-10	5.27829375418152e-09	11	CASi-7d_vs_CA-7d
GO:0036294	cellular response to decreased oxygen levels	1.31396616240742e-09	2.78748535882145e-07	30	CASi-7d_vs_CA-7d
GO:0071453	cellular response to oxygen levels	1.31396616240742e-09	2.78748535882145e-07	30	CASi-7d_vs_CA-7d
GO:0043661	peribacteroid membrane	1.50821432092635e-07	3.8459465183622e-06	8	CASi-7d_vs_CA-7d
GO:0043659	symbiosome	2.09643814045392e-07	4.00943794361812e-06	8	CASi-7d_vs_CA-7d
GO:0036294	cellular response to decreased oxygen levels	9.58856962001353e-21	6.43393021502908e-18	48	CASi-7d_vs_CK-7d
GO:0071453	cellular response to oxygen levels	9.58856962001353e-21	6.43393021502908e-18	48	CASi-7d_vs_CK-7d
GO:0071456	cellular response to hypoxia	2.42329706966027e-19	1.08402155582803e-16	46	CASi-7d_vs_CK-7d
GO:0036293	response to decreased oxygen levels	1.0464469486534e-17	3.4677015545497e-15	49	CASi-7d_vs_CK-7d
GO:0070482	response to oxygen levels	1.29199014700064e-17	3.4677015545497e-15	49	CASi-7d_vs_CK-7d
GO:0009611	response to wounding	4.85618965973789e-17	1.08616775389471e-14	53	CASi-7d_vs_CK-7d
GO:0001666	response to hypoxia	1.53284294827559e-16	2.93867890940835e-14	47	CASi-7d_vs_CK-7d
GO:0071398	cellular response to fatty acid	9.33282497240113e-10	1.56558138912029e-07	32	CASi-7d_vs_CK-7d
GO:0042744	hydrogen peroxide catabolic process	1.76552134059807e-09	2.63258848786956e-07	25	CASi-7d_vs_CK-7d
GO:0009867	jasmonic acid mediated signaling pathway	2.35746909949151e-09	3.16372353151761e-07	30	CASi-7d_vs_CK-7d
GO:0071395	cellular response to jasmonic acid stimulus	2.90766391908088e-09	3.54734998127868e-07	31	CASi-7d_vs_CK-7d
GO:0009753	response to jasmonic acid	3.44995342277781e-09	3.72291703513933e-07	41	CASi-7d_vs_CK-7d
GO:0009751	response to salicylic acid	3.60640249305599e-09	3.72291703513933e-07	37	CASi-7d_vs_CK-7d
GO:2000022	regulation of jasmonic acid mediated signaling pat...	4.80737000716776e-09	4.60820753544224e-07	18	CASi-7d_vs_CK-7d
GO:0002252	immune effector process	1.28053899667395e-08	1.14565555569096e-06	11	CASi-7d_vs_CK-7d

## Sheet: Table.S4
Table S4. Statistics of the number of DEGs corresponding to KEGG pathways (2d)
#Term	ID	CA vs CK （DEG number）			#Term	ID	CA vs CASi （DEG number）		#Term	ID	CK vsCASi（DEG number）
		up	down				up	down			up	down
Biosynthesis of secondary metabolites	ko01110	206	218		Phenylpropanoid biosynthesis	ko00940	53	17	Biosynthesis of secondary metabolites	ko01110	199	30
Phenylpropanoid biosynthesis	ko00940	36	52		Pentose and glucuronate interconversions	ko00040	33	18	Metabolic pathways	ko01100	263	46
Metabolic pathways	ko01100	310	284		Biosynthesis of secondary metabolites	ko01110	210	64	Isoflavonoid biosynthesis	ko00943	30	3
Isoflavonoid biosynthesis	ko00943	28	30		Biotin metabolism	ko00780	1	20	Phenylpropanoid biosynthesis	ko00940	39	2
Biotin metabolism	ko00780	21	3		Metabolic pathways	ko01100	292	127	Biosynthesis of various plant secondary metabolites	ko00999	20	2
Fatty acid biosynthesis	ko00061	23	8		Isoflavonoid biosynthesis	ko00943	28	7	Nitrogen metabolism	ko00910	7	6
Fatty acid metabolism	ko01212	27	9		Fatty acid biosynthesis	ko00061	3	21	Pentose and glucuronate interconversions	ko00040	20	7
Diterpenoid biosynthesis	ko00904	5	15		Plant-pathogen interaction	ko04626	122	29	Plant-pathogen interaction	ko04626	78	22
Pentose and glucuronate interconversions	ko00040	18	25		Photosynthesis - antenna proteins	ko00196	12	0	Alanine, aspartate and glutamate metabolism	ko00250	15	1
Biosynthesis of various plant secondary metabolites	ko00999	17	11		MAPK signaling pathway - plant	ko04016	72	20	MAPK signaling pathway - plant	ko04016	52	8
MAPK signaling pathway - plant	ko04016	47	62		Plant hormone signal transduction	ko04075	96	28	Cyanoamino acid metabolism	ko00460	11	1
Alanine, aspartate and glutamate metabolism	ko00250	20	3		Biosynthesis of various plant secondary metabolites	ko00999	19	5	Ubiquinone and other terpenoid-quinone biosynthesis	ko00130	13	0
Photosynthesis - antenna proteins	ko00196		10		Carotenoid biosynthesis	ko00906	17	1	Glucosinolate biosynthesis	ko00966	4	1
Nitrogen metabolism	ko00910	6	9		Fatty acid metabolism	ko01212	3	21	Isoquinoline alkaloid biosynthesis	ko00950	6	2
Plant hormone signal transduction	ko04075	54	94		alpha-Linolenic acid metabolism	ko00592	12	7	Starch and sucrose metabolism	ko00500	25	6
Isoquinoline alkaloid biosynthesis	ko00950	6	6		Nitrogen metabolism	ko00910	8	3	Cysteine and methionine metabolism	ko00270	17	3
alpha-Linolenic acid metabolism	ko00592	10	11		Galactose metabolism	ko00052	17	1	Tyrosine metabolism	ko00350	8	2
Plant-pathogen interaction	ko04626	66	105		Protein processing in endoplasmic reticulum	ko04141	13	37	Linoleic acid metabolism	ko00591	6	1
Valine, leucine and isoleucine degradation	ko00280	17	2		Linoleic acid metabolism	ko00591	5	3	Monoterpenoid biosynthesis	ko00902	3	0
Cutin, suberine and wax biosynthesis	ko00073	3	10		Cutin, suberine and wax biosynthesis	ko00073	8	1	Diterpenoid biosynthesis	ko00904	2	6
Tropane, piperidine and pyridine alkaloid biosynthesis	ko00960	6	7		Diterpenoid biosynthesis	ko00904	8	1	Valine, leucine and isoleucine degradation	ko00280	10	0
Monoterpenoid biosynthesis	ko00902	2	2		Stilbenoid, diarylheptanoid and gingerol biosynthesis	ko00945	6	2	ABC transporters	ko02010	9	6
Cysteine and methionine metabolism	ko00270	19	13		Flavonoid biosynthesis	ko00941	11	4	Carbon fixation in photosynthetic organisms	ko00710	9	2
Carotenoid biosynthesis	ko00906	1	16		Brassinosteroid biosynthesis	ko00905	5	0	Glutathione metabolism	ko00480	11	2
Tyrosine metabolism	ko00350	9	6		Cyanoamino acid metabolism	ko00460	7	2	Tropane, piperidine and pyridine alkaloid biosynthesis	ko00960	4	2
Fatty acid degradation	ko00071	10	6		Zeatin biosynthesis	ko00908	4	3	alpha-Linolenic acid metabolism	ko00592	8	1
Zeatin biosynthesis	ko00908	4	7		Glycosphingolipid biosynthesis - ganglio series	ko00604	5	0	Sulfur metabolism	ko00920	4	2
Tryptophan metabolism	ko00380	13	5		Terpenoid backbone biosynthesis	ko00900	8	3	Glyoxylate and dicarboxylate metabolism	ko00630	8	2
Glucosinolate biosynthesis	ko00966	5			Isoquinoline alkaloid biosynthesis	ko00950	5	1	Arginine biosynthesis	ko00220	4	1
Galactose metabolism	ko00052	7	13		Glucosinolate biosynthesis	ko00966	1	2	Propanoate metabolism	ko00640	6	0
Arginine biosynthesis	ko00220	7	3		Ether lipid metabolism	ko00565	4	2	Photosynthesis - antenna proteins	ko00196	3	0
Glutathione metabolism	ko00480	17	5		Tropane, piperidine and pyridine alkaloid biosynthesis	ko00960	5	2	Galactose metabolism	ko00052	8	1
Cyanoamino acid metabolism	ko00460	9	3		Tryptophan metabolism	ko00380	7	4	Plant hormone signal transduction	ko04075	45	18
Phenylalanine metabolism	ko00360	5	6		Taurine and hypotaurine metabolism	ko00430	0	3	Carbon metabolism	ko01200	23	3
ABC transporters	ko02010	8	16		Tyrosine metabolism	ko00350	5	3	Glycosphingolipid biosynthesis - ganglio series	ko00604	3	0
Linoleic acid metabolism	ko00591	4	4		Flavone and flavonol biosynthesis	ko00944	4	1	Arginine and proline metabolism	ko00330	5	3
Flavonoid biosynthesis	ko00941	8	10		Arachidonic acid metabolism	ko00590	1	2	Ascorbate and aldarate metabolism	ko00053	7	0
Terpenoid backbone biosynthesis	ko00900	6	8		Glycerophospholipid metabolism	ko00564	13	3	Lipoic acid metabolism	ko00785	4	0
Fatty acid elongation	ko00062		8		Glycosaminoglycan degradation	ko00531	5	0	Valine, leucine and isoleucine biosynthesis	ko00290	3	0
Pantothenate and CoA biosynthesis	ko00770	7	4		Other glycan degradation	ko00511	5	0	2-Oxocarboxylic acid metabolism	ko01210	5	1
Taurine and hypotaurine metabolism	ko00430	4			Starch and sucrose metabolism	ko00500	18	11	Pantothenate and CoA biosynthesis	ko00770	4	1
Brassinosteroid biosynthesis	ko00905		5		Phenylalanine metabolism	ko00360	4	1	Terpenoid backbone biosynthesis	ko00900	5	1
Stilbenoid, diarylheptanoid and gingerol biosynthesis	ko00945	4	4		Amino sugar and nucleotide sugar metabolism	ko00520	17	3	Biosynthesis of amino acids	ko01230	18	4
Flavone and flavonol biosynthesis	ko00944	2	5		Monoterpenoid biosynthesis	ko00902	1	0	Pentose phosphate pathway	ko00030	4	2
Ubiquinone and other terpenoid-quinone biosynthesis	ko00130	10	2		Arginine and proline metabolism	ko00330	8	1	Flavone and flavonol biosynthesis	ko00944	3	0
beta-Alanine metabolism	ko00410	8	4		Cysteine and methionine metabolism	ko00270	11	4	Vitamin B6 metabolism	ko00750	2	0
Starch and sucrose metabolism	ko00500	25	18		Glutathione metabolism	ko00480	7	3	Biosynthesis of cofactors	ko01240	21	3
Butanoate metabolism	ko00650	6	1		C5-Branched dibasic acid metabolism	ko00660	0	1	Carotenoid biosynthesis	ko00906	4	1
Protein processing in endoplasmic reticulum	ko04141	42	11		Pantothenate and CoA biosynthesis	ko00770	4	1	Biosynthesis of unsaturated fatty acids	ko01040	2	0
Arginine and proline metabolism	ko00330	7	8		ABC transporters	ko02010	8	3	Zeatin biosynthesis	ko00908	2	1
Biosynthesis of cofactors	ko01240	42	11		Photosynthesis	ko00195	6	1	Stilbenoid, diarylheptanoid and gingerol biosynthesis	ko00945	2	1
Amino sugar and nucleotide sugar metabolism	ko00520	16	14		Sphingolipid metabolism	ko00600	5	0	Glycosaminoglycan degradation	ko00531	3	0
Ascorbate and aldarate metabolism	ko00053	10	3		Fatty acid elongation	ko00062	3	0	Other glycan degradation	ko00511	3	0
Glyoxylate and dicarboxylate metabolism	ko00630	12	3		Arginine biosynthesis	ko00220	2	1	Citrate cycle (TCA cycle)	ko00020	4	1
Propanoate metabolism	ko00640	8			Biosynthesis of cofactors	ko01240	10	22	Sphingolipid metabolism	ko00600	4	0
Glycosphingolipid biosynthesis - ganglio series	ko00604	3	1		Fatty acid degradation	ko00071	3	2	Cutin, suberine and wax biosynthesis	ko00073	3	0
C5-Branched dibasic acid metabolism	ko00660	2			Valine, leucine and isoleucine biosynthesis	ko00290	1	1	Tryptophan metabolism	ko00380	4	1
Glycerolipid metabolism	ko00561	6	9		Alanine, aspartate and glutamate metabolism	ko00250	3	3	Thiamine metabolism	ko00730	2	0
Caffeine metabolism	ko00232	1			Base excision repair	ko03410	5	0	Flavonoid biosynthesis	ko00941	4	2
Lipoic acid metabolism	ko00785	5	1		Biosynthesis of nucleotide sugars	ko01250	9	1	Amino sugar and nucleotide sugar metabolism	ko00520	12	0
Glycosaminoglycan degradation	ko00531	3	3		2-Oxocarboxylic acid metabolism	ko01210	1	4	beta-Alanine metabolism	ko00410	4	0
Valine, leucine and isoleucine biosynthesis	ko00290	4			Carbon fixation in photosynthetic organisms	ko00710	5	1	Taurine and hypotaurine metabolism	ko00430	1	0
Histidine metabolism	ko00340	3	1		Lysine biosynthesis	ko00300	1	0	Glycosphingolipid biosynthesis - globo and isoglobo series	ko00603	1	0
Carbon fixation in photosynthetic organisms	ko00710	8	3		Other types of O-glycan biosynthesis	ko00514	1	0	Fatty acid elongation	ko00062	1	1
Pentose phosphate pathway	ko00030	4	6		Sesquiterpenoid and triterpenoid biosynthesis	ko00909	1	0	Pyruvate metabolism	ko00620	8	0
Thiamine metabolism	ko00730	3	1		Butanoate metabolism	ko00650	0	2	Arachidonic acid metabolism	ko00590	1	0
2-Oxocarboxylic acid metabolism	ko01210	9			Pentose phosphate pathway	ko00030	4	1	Other types of O-glycan biosynthesis	ko00514	0	1
Vitamin B6 metabolism	ko00750	2	1		Inositol phosphate metabolism	ko00562	7	1	Folate biosynthesis	ko00790	2	0
Lysine degradation	ko00310	6	2		Ubiquinone and other terpenoid-quinone biosynthesis	ko00130	3	1	Brassinosteroid biosynthesis	ko00905	1	0
Biosynthesis of unsaturated fatty acids	ko01040	2	1		Ascorbate and aldarate metabolism	ko00053	5	0	Selenocompound metabolism	ko00450	1	0
Glycolysis / Gluconeogenesis	ko00010	16	6		beta-Alanine metabolism	ko00410	4	0	Fructose and mannose metabolism	ko00051	3	1
Arachidonic acid metabolism	ko00590	1	1		Folate biosynthesis	ko00790	2	0	Homologous recombination	ko03440	5	0
Pyruvate metabolism	ko00620	15	2		Vitamin B6 metabolism	ko00750	0	1	Phenylalanine metabolism	ko00360	2	0
Peroxisome	ko04146	5	7		Glyoxylate and dicarboxylate metabolism	ko00630	3	3	Fatty acid degradation	ko00071	3	0
Sulfur metabolism	ko00920	4	1		Phagosome	ko04145	5	1	Purine metabolism	ko00230	6	0
Sesquiterpenoid and triterpenoid biosynthesis	ko00909		2		Circadian rhythm - plant	ko04712	11	1	Glycolysis / Gluconeogenesis	ko00010	7	1
Phenylalanine, tyrosine and tryptophan biosynthesis	ko00400	3	3		Homologous recombination	ko03440	2	4	Photosynthesis	ko00195	3	0
Carbon metabolism	ko01200	31	9		Histidine metabolism	ko00340	1	0	Riboflavin metabolism	ko00740	1	0
Other glycan degradation	ko00511	3	1		Glycerolipid metabolism	ko00561	5	1	Butanoate metabolism	ko00650	1	0
Glycerophospholipid metabolism	ko00564	4	12		RNA polymerase	ko03020	0	3	Ether lipid metabolism	ko00565	1	0
Phagosome	ko04145	2	8		Autophagy - other	ko04136	1	1	Nicotinate and nicotinamide metabolism	ko00760	1	0
Fructose and mannose metabolism	ko00051	5	3		Glycolysis / Gluconeogenesis	ko00010	6	5	Glycerolipid metabolism	ko00561	3	1
Purine metabolism	ko00230	9	4		Fructose and mannose metabolism	ko00051	3	1	Lysine degradation	ko00310	2	0
Citrate cycle (TCA cycle)	ko00020	5	2		Porphyrin metabolism	ko00860	2	1	Viral life cycle - HIV-1	ko03250	1	0
Base excision repair	ko03410		6		Riboflavin metabolism	ko00740	0	1	Fatty acid metabolism	ko01212	3	1
Lysine biosynthesis	ko00300		1		Glycine, serine and threonine metabolism	ko00260	3	1	Biotin metabolism	ko00780	0	1
Other types of O-glycan biosynthesis	ko00514		1		Nicotinate and nicotinamide metabolism	ko00760	0	1	Inositol phosphate metabolism	ko00562	4	0
Biosynthesis of nucleotide sugars	ko01250	8	4		Phenylalanine, tyrosine and tryptophan biosynthesis	ko00400	1	1	Steroid biosynthesis	ko00100	1	0
Riboflavin metabolism	ko00740	1	1		N-Glycan biosynthesis	ko00510	2	0	Mismatch repair	ko03430	1	0
Selenocompound metabolism	ko00450	1			Viral life cycle - HIV-1	ko03250	0	1	Peroxisome	ko04146	1	2
Ether lipid metabolism	ko00565	1	1		Endocytosis	ko04144	13	4	SNARE interactions in vesicular transport	ko04130	0	1
Sphingolipid metabolism	ko00600	3	1		Lipoic acid metabolism	ko00785	1	0	Biosynthesis of nucleotide sugars	ko01250	4	0
Homologous recombination	ko03440	6	2		Pyruvate metabolism	ko00620	3	4	Phenylalanine, tyrosine and tryptophan biosynthesis	ko00400	1	0
Folate biosynthesis	ko00790	1	1		Sulfur metabolism	ko00920	0	1	Glycine, serine and threonine metabolism	ko00260	2	0
Viral life cycle - HIV-1	ko03250	1	1		Peroxisome	ko04146	3	1	N-Glycan biosynthesis	ko00510	0	1
Biosynthesis of amino acids	ko01230	20	11		Various types of N-glycan biosynthesis	ko00513	1	0	Protein export	ko03060	0	1
Glycine, serine and threonine metabolism	ko00260	3	3		Steroid biosynthesis	ko00100	1	0	Glycerophospholipid metabolism	ko00564	3	1
N-Glycan biosynthesis	ko00510		3		Valine, leucine and isoleucine degradation	ko00280	2	0	Phagosome	ko04145	0	2
Inositol phosphate metabolism	ko00562	4	4		Propanoate metabolism	ko00640	1	0	Porphyrin metabolism	ko00860	1	0
Autophagy - other	ko04136	1	1		Phosphatidylinositol signaling system	ko04070	3	0	Fatty acid biosynthesis	ko00061	0	1
SNARE interactions in vesicular transport	ko04130	1	1		Aminoacyl-tRNA biosynthesis	ko00970	2	0	Circadian rhythm - plant	ko04712	3	1
Porphyrin metabolism	ko00860	2	1		Motor proteins	ko04814	7	0	Nucleotide metabolism	ko01232	2	0
Photosynthesis	ko00195	1	3		Lysine degradation	ko00310	1	0	Phosphatidylinositol signaling system	ko04070	1	0
Motor proteins	ko04814		11		Ubiquitin mediated proteolysis	ko04120	6	3	Nucleocytoplasmic transport	ko03013	2	0
Circadian rhythm - plant	ko04712	1	11		Nucleotide excision repair	ko03420	0	2	Ribosome biogenesis in eukaryotes	ko03008	1	0
Steroid biosynthesis	ko00100	1			Purine metabolism	ko00230	1	2	Oxidative phosphorylation	ko00190	3	0
Mismatch repair	ko03430	1			Polycomb repressive complex	ko03083	1	0	Protein processing in endoplasmic reticulum	ko04141	5	2
Ubiquitin mediated proteolysis	ko04120	8	7		Carbon metabolism	ko01200	10	5	Motor proteins	ko04814	1	0
Nucleotide metabolism	ko01232	4	1		Biosynthesis of amino acids	ko01230	7	6	mRNA surveillance pathway	ko03015	1	0
Aminoacyl-tRNA biosynthesis	ko00970	1	1		ATP-dependent chromatin remodeling	ko03082	0	1	Ubiquitin mediated proteolysis	ko04120	2	0
Protein export	ko03060		1		Spliceosome	ko03040	4	4	RNA degradation	ko03018	1	0
RNA polymerase	ko03020	1			Nucleotide metabolism	ko01232	0	1	Endocytosis	ko04144	1	1
Phosphatidylinositol signaling system	ko04070		2		Nucleocytoplasmic transport	ko03013	1	0
Endocytosis	ko04144	5	10		Oxidative phosphorylation	ko00190	1	2
RNA degradation	ko03018	3	5		RNA degradation	ko03018	1	1
Polycomb repressive complex	ko03083		1		mRNA surveillance pathway	ko03015	0	1
Ribosome biogenesis in eukaryotes	ko03008	1	1		Ribosome	ko03010	1	0
Pyrimidine metabolism	ko00240	1
Nucleotide excision repair	ko03420	1
ATP-dependent chromatin remodeling	ko03082	1
Nucleocytoplasmic transport	ko03013		2
Oxidative phosphorylation	ko00190	4	1
Spliceosome	ko03040	3	4
mRNA surveillance pathway	ko03015	1
Ribosome	ko03010	2	3

## Sheet: Table.S5
Table S5. Statistics of the number of DEGs corresponding to KEGG pathways (7d)
#Term	ID	CA vs CK （DEG number）		#Term	ID	CA vs CASi （DEG number）		#Term	ID	CK vsCASi（DEG number）
		up	down			up	down			up	down
MAPK signaling pathway - plant	ko04016	18	78	Photosynthesis	ko00195	0	44	MAPK signaling pathway - plant	ko04016	26	59
Plant hormone signal transduction	ko04075	28	91	Photosynthesis - antenna proteins	ko00196	0	17	Plant hormone signal transduction	ko04075	27	74
Plant-pathogen interaction	ko04626	12	118	Metabolic pathways	ko01100	127	127	Isoflavonoid biosynthesis	ko00943	23	5
Biosynthesis of secondary metabolites	ko01110	75	105	Biosynthesis of secondary metabolites	ko01110	102	60	Phenylpropanoid biosynthesis	ko00940	30	7
Biosynthesis of various plant secondary metabolites	ko00999	4	15	Nitrogen metabolism	ko00910	12	1	Biosynthesis of secondary metabolites	ko01110	98	58
Phenylpropanoid biosynthesis	ko00940	22	11	Biosynthesis of various plant secondary metabolites	ko00999	17	0	Photosynthesis - antenna proteins	ko00196	0	10
Cysteine and methionine metabolism	ko00270	6	18	Cysteine and methionine metabolism	ko00270	18	5	Plant-pathogen interaction	ko04626	28	67
Valine, leucine and isoleucine biosynthesis	ko00290	1	7	Valine, leucine and isoleucine biosynthesis	ko00290	7	2	alpha-Linolenic acid metabolism	ko00592	4	9
Cutin, suberine and wax biosynthesis	ko00073	2	8	Phenylpropanoid biosynthesis	ko00940	17	9	Protein processing in endoplasmic reticulum	ko04141	5	27
Carotenoid biosynthesis	ko00906	3	10	Porphyrin metabolism	ko00860	1	11	Flavonoid biosynthesis	ko00941	7	5
Pentose and glucuronate interconversions	ko00040	9	10	2-Oxocarboxylic acid metabolism	ko01210	7	3	Linoleic acid metabolism	ko00591	4	2
alpha-Linolenic acid metabolism	ko00592	0	11	Glucosinolate biosynthesis	ko00966	1	3	Biosynthesis of various plant secondary metabolites	ko00999	6	5
Cyanoamino acid metabolism	ko00460	3	5	Isoflavonoid biosynthesis	ko00943	11	3	Carotenoid biosynthesis	ko00906	4	5
Isoquinoline alkaloid biosynthesis	ko00950	4	2	Carotenoid biosynthesis	ko00906	5	4	Stilbenoid, diarylheptanoid and gingerol biosynthesis	ko00945	4	2
Linoleic acid metabolism	ko00591	5	1	Carbon fixation in photosynthetic organisms	ko00710	1	9	Glucosinolate biosynthesis	ko00966	1	2
Nitrogen metabolism	ko00910	2	5	Stilbenoid, diarylheptanoid and gingerol biosynthesis	ko00945	3	3	Cutin, suberine and wax biosynthesis	ko00073	2	4
Phenylalanine, tyrosine and tryptophan biosynthesis	ko00400	4	4	Glyoxylate and dicarboxylate metabolism	ko00630	4	6	Photosynthesis	ko00195	0	9
Starch and sucrose metabolism	ko00500	16	11	Cyanoamino acid metabolism	ko00460	5	1	Monoterpenoid biosynthesis	ko00902	2	0
Photosynthesis	ko00195	10	0	Cutin, suberine and wax biosynthesis	ko00073	3	2	Cysteine and methionine metabolism	ko00270	8	6
Glucosinolate biosynthesis	ko00966	1	2	MAPK signaling pathway - plant	ko04016	29	8	Propanoate metabolism	ko00640	2	3
2-Oxocarboxylic acid metabolism	ko01210	1	8	Pantothenate and CoA biosynthesis	ko00770	4	2	Betalain biosynthesis	ko00965	1	0
Metabolic pathways	ko01100	113	142	Diterpenoid biosynthesis	ko00904	3	2	Nitrogen metabolism	ko00910	3	1
Tropane, piperidine and pyridine alkaloid biosynthesis	ko00960	3	3	Isoquinoline alkaloid biosynthesis	ko00950	3	1	Diterpenoid biosynthesis	ko00904	2	2
Isoflavonoid biosynthesis	ko00943	10	3	Biosynthesis of amino acids	ko01230	18	4	Glutathione metabolism	ko00480	5	3
Pyruvate metabolism	ko00620	4	10	Exopolysaccharide biosynthesis	ko00543	2	0	Cyanoamino acid metabolism	ko00460	3	1
Tyrosine metabolism	ko00350	5	2	Linoleic acid metabolism	ko00591	1	3	Zeatin biosynthesis	ko00908	2	1
Galactose metabolism	ko00052	2	8	Riboflavin metabolism	ko00740	3	1	Carbon fixation in photosynthetic organisms	ko00710	3	2
Carbon fixation in photosynthetic organisms	ko00710	6	3	Pentose phosphate pathway	ko00030	2	5	Ubiquinone and other terpenoid-quinone biosynthesis	ko00130	4	0
Photosynthesis - antenna proteins	ko00196	3	0	Tryptophan metabolism	ko00380	4	3	Circadian rhythm - plant	ko04712	0	10
Alanine, aspartate and glutamate metabolism	ko00250	5	3	Carbon metabolism	ko01200	9	14	Thiamine metabolism	ko00730	2	0
Glycosphingolipid biosynthesis - lacto and neolacto series	ko00601	1	0	Pyruvate metabolism	ko00620	9	2	Porphyrin metabolism	ko00860	0	4
Diterpenoid biosynthesis	ko00904	1	4	Ubiquinone and other terpenoid-quinone biosynthesis	ko00130	4	2	Pyruvate metabolism	ko00620	5	3
Glyoxylate and dicarboxylate metabolism	ko00630	4	5	Flavonoid biosynthesis	ko00941	5	3	Flavone and flavonol biosynthesis	ko00944	2	0
Phenylalanine metabolism	ko00360	3	2	Pentose and glucuronate interconversions	ko00040	9	3	Taurine and hypotaurine metabolism	ko00430	1	0
N-Glycan biosynthesis	ko00510	0	6	Glycosphingolipid biosynthesis - lacto and neolacto series	ko00601	0	1	Metabolic pathways	ko01100	101	86
Fatty acid elongation	ko00062	1	3	Glycolysis / Gluconeogenesis	ko00010	6	6	Galactose metabolism	ko00052	1	4
Stilbenoid, diarylheptanoid and gingerol biosynthesis	ko00945	3	1	Caffeine metabolism	ko00232	1	0	N-Glycan biosynthesis	ko00510	0	3
Tryptophan metabolism	ko00380	2	5	Sulfur metabolism	ko00920	4	0	Alanine, aspartate and glutamate metabolism	ko00250	3	1
Ubiquinone and other terpenoid-quinone biosynthesis	ko00130	5	1	Alanine, aspartate and glutamate metabolism	ko00250	4	2	Glycolysis / Gluconeogenesis	ko00010	6	3
Ascorbate and aldarate metabolism	ko00053	2	5	alpha-Linolenic acid metabolism	ko00592	5	1	Ascorbate and aldarate metabolism	ko00053	2	2
Glycosphingolipid biosynthesis - globo and isoglobo series	ko00603	2	0	Glycosphingolipid biosynthesis - globo and isoglobo series	ko00603	0	2	Biotin metabolism	ko00780	2	0
Biosynthesis of amino acids	ko01230	6	18	Plant-pathogen interaction	ko04626	53	6	Sesquiterpenoid and triterpenoid biosynthesis	ko00909	0	1
Flavonoid biosynthesis	ko00941	3	5	Monoterpenoid biosynthesis	ko00902	1	0	Valine, leucine and isoleucine degradation	ko00280	2	1
Pantothenate and CoA biosynthesis	ko00770	1	4	Terpenoid backbone biosynthesis	ko00900	3	2	Biosynthesis of unsaturated fatty acids	ko01040	1	0
Sulfur metabolism	ko00920	0	4	Biosynthesis of cofactors	ko01240	15	6	2-Oxocarboxylic acid metabolism	ko01210	1	2
Riboflavin metabolism	ko00740	0	3	Arginine biosynthesis	ko00220	3	0	Glyoxylate and dicarboxylate metabolism	ko00630	0	4
Glutathione metabolism	ko00480	5	3	Folate biosynthesis	ko00790	3	0	SNARE interactions in vesicular transport	ko04130	0	2
ABC transporters	ko02010	1	8	Biotin metabolism	ko00780	2	1	Fatty acid biosynthesis	ko00061	2	1
Arginine biosynthesis	ko00220	1	2	Protein processing in endoplasmic reticulum	ko04141	3	17	Pentose phosphate pathway	ko00030	0	3
Folate biosynthesis	ko00790	0	3	Tyrosine metabolism	ko00350	3	1	Valine, leucine and isoleucine biosynthesis	ko00290	1	0
Exopolysaccharide biosynthesis	ko00543	0	1	Tropane, piperidine and pyridine alkaloid biosynthesis	ko00960	1	2	Pentose and glucuronate interconversions	ko00040	6	1
C5-Branched dibasic acid metabolism	ko00660	0	1	C5-Branched dibasic acid metabolism	ko00660	1	0	Tryptophan metabolism	ko00380	1	2
Arginine and proline metabolism	ko00330	4	2	ABC transporters	ko02010	6	1	Glycerophospholipid metabolism	ko00564	2	4
Thiamine metabolism	ko00730	1	1	Thiamine metabolism	ko00730	2	0	Isoquinoline alkaloid biosynthesis	ko00950	1	0
Flavone and flavonol biosynthesis	ko00944	2	0	Valine, leucine and isoleucine degradation	ko00280	2	2	Tyrosine metabolism	ko00350	2	0
Porphyrin metabolism	ko00860	2	2	Galactose metabolism	ko00052	3	2	Carbon metabolism	ko01200	8	7
Butanoate metabolism	ko00650	0	2	Butanoate metabolism	ko00650	2	0	Fatty acid metabolism	ko01212	3	1
Glycine, serine and threonine metabolism	ko00260	2	3	Taurine and hypotaurine metabolism	ko00430	1	0	Fatty acid elongation	ko00062	0	1
Ether lipid metabolism	ko00565	0	2	Ascorbate and aldarate metabolism	ko00053	3	1	Base excision repair	ko03410	1	1
Terpenoid backbone biosynthesis	ko00900	2	2	Peroxisome	ko04146	3	2	Arginine biosynthesis	ko00220	1	0
Carbon metabolism	ko01200	12	9	Fructose and mannose metabolism	ko00051	1	3	Lipoic acid metabolism	ko00785	0	1
Biotin metabolism	ko00780	1	1	Sesquiterpenoid and triterpenoid biosynthesis	ko00909	0	1	Terpenoid backbone biosynthesis	ko00900	2	0
Glycosaminoglycan degradation	ko00531	0	2	Glycine, serine and threonine metabolism	ko00260	2	2	Tropane, piperidine and pyridine alkaloid biosynthesis	ko00960	0	1
Protein processing in endoplasmic reticulum	ko04141	10	11	Glutathione metabolism	ko00480	3	2	Sulfur metabolism	ko00920	1	0
Other glycan degradation	ko00511	1	1	Fatty acid metabolism	ko01212	4	1	Citrate cycle (TCA cycle)	ko00020	2	0
Vitamin B6 metabolism	ko00750	0	1	Phenylalanine metabolism	ko00360	1	1	Peroxisome	ko04146	2	1
Glycosphingolipid biosynthesis - ganglio series	ko00604	0	1	Selenocompound metabolism	ko00450	1	0	Ubiquitin mediated proteolysis	ko04120	2	6
Biosynthesis of cofactors	ko01240	7	14	Biosynthesis of unsaturated fatty acids	ko01040	1	0	Mismatch repair	ko03430	0	1
beta-Alanine metabolism	ko00410	1	2	Glycosphingolipid biosynthesis - ganglio series	ko00604	1	0	Pantothenate and CoA biosynthesis	ko00770	1	0
Valine, leucine and isoleucine degradation	ko00280	1	2	Fatty acid biosynthesis	ko00061	2	1	RNA degradation	ko03018	2	4
Glycolysis / Gluconeogenesis	ko00010	5	4	Plant hormone signal transduction	ko04075	27	14	Arginine and proline metabolism	ko00330	1	1
SNARE interactions in vesicular transport	ko04130	0	2	Starch and sucrose metabolism	ko00500	7	5	DNA replication	ko03030	0	1
Histidine metabolism	ko00340	0	1	Histidine metabolism	ko00340	1	0	Fatty acid degradation	ko00071	1	0
Glycerophospholipid metabolism	ko00564	0	7	Purine metabolism	ko00230	5	0	beta-Alanine metabolism	ko00410	1	0
Phosphatidylinositol signaling system	ko04070	0	4	Phenylalanine, tyrosine and tryptophan biosynthesis	ko00400	1	1	Homologous recombination	ko03440	2	0
Aminoacyl-tRNA biosynthesis	ko00970	0	3	Circadian rhythm - plant	ko04712	1	6	Nucleotide excision repair	ko03420	1	1
Sphingolipid metabolism	ko00600	1	1	Glycerolipid metabolism	ko00561	2	2	Amino sugar and nucleotide sugar metabolism	ko00520	3	2
Peroxisome	ko04146	1	3	N-Glycan biosynthesis	ko00510	2	0	Fructose and mannose metabolism	ko00051	0	1
Nicotinate and nicotinamide metabolism	ko00760	0	1	Sphingolipid metabolism	ko00600	1	1	Glycine, serine and threonine metabolism	ko00260	0	1
Glycerolipid metabolism	ko00561	1	3	Fatty acid elongation	ko00062	1	0	ABC transporters	ko02010	2	0
Fatty acid degradation	ko00071	1	1	Nicotinate and nicotinamide metabolism	ko00760	0	1	Biosynthesis of nucleotide sugars	ko01250	1	1
Various types of N-glycan biosynthesis	ko00513	0	1	Arginine and proline metabolism	ko00330	1	2	Starch and sucrose metabolism	ko00500	4	3
Steroid biosynthesis	ko00100	1	0	Zeatin biosynthesis	ko00908	1	0	Phagosome	ko04145	1	0
Amino sugar and nucleotide sugar metabolism	ko00520	3	5	Phosphatidylinositol signaling system	ko04070	3	0	Biosynthesis of cofactors	ko01240	8	2
Fatty acid biosynthesis	ko00061	1	1	Amino sugar and nucleotide sugar metabolism	ko00520	5	2	Endocytosis	ko04144	1	5
Citrate cycle (TCA cycle)	ko00020	2	0	Glycosaminoglycan degradation	ko00531	1	0	Glycerolipid metabolism	ko00561	0	1
Pentose phosphate pathway	ko00030	1	1	Other glycan degradation	ko00511	1	0	Inositol phosphate metabolism	ko00562	1	0
Propanoate metabolism	ko00640	0	1	Biosynthesis of nucleotide sugars	ko01250	1	3	Biosynthesis of amino acids	ko01230	4	3
Biosynthesis of nucleotide sugars	ko01250	2	2	Aminoacyl-tRNA biosynthesis	ko00970	2	0	Purine metabolism	ko00230	1	0
Fructose and mannose metabolism	ko00051	2	0	Various types of N-glycan biosynthesis	ko00513	1	0	mRNA surveillance pathway	ko03015	0	2
Circadian rhythm - plant	ko04712	0	6	Steroid biosynthesis	ko00100	0	1	Spliceosome	ko03040	1	2
Fatty acid metabolism	ko01212	1	2	Propanoate metabolism	ko00640	1	0	Oxidative phosphorylation	ko00190	0	1
Lysine degradation	ko00310	0	1	Inositol phosphate metabolism	ko00562	2	1	Ribosome	ko03010	0	1
Base excision repair	ko03410	1	0	Glycerophospholipid metabolism	ko00564	4	0
RNA degradation	ko03018	3	3	Pyrimidine metabolism	ko00240	2	0
Ubiquitin mediated proteolysis	ko04120	1	6	Lysine degradation	ko00310	1	0
Inositol phosphate metabolism	ko00562	1	1	Fatty acid degradation	ko00071	1	0
Polycomb repressive complex	ko03083	0	1	beta-Alanine metabolism	ko00410	1	0
Endocytosis	ko04144	0	8	RNA degradation	ko03018	2	3
Pyrimidine metabolism	ko00240	0	1	Citrate cycle (TCA cycle)	ko00020	0	1
Homologous recombination	ko03440	1	0	Nucleotide metabolism	ko01232	2	0
Nucleotide metabolism	ko01232	0	1	Polycomb repressive complex	ko03083	1	0
Nucleocytoplasmic transport	ko03013	1	0	Nucleocytoplasmic transport	ko03013	1	1
Motor proteins	ko04814	1	0	mRNA surveillance pathway	ko03015	0	3
Spliceosome	ko03040	1	0	Homologous recombination	ko03440	1	0
Ribosome	ko03010	0	2	Nucleotide excision repair	ko03420	0	1
				Oxidative phosphorylation	ko00190	0	1
				Spliceosome	ko03040	0	2
				Endocytosis	ko04144	1	1
				Ubiquitin mediated proteolysis	ko04120	0	1

## Sheet: Table.S6
Table S6. List of significant pathways identified by KEGG enrichments analysis of the annotated DEGs among three treatments.（2d)
	ID	Pathway	Number	p-Value
CK vs CA comparison	ko01110	Biosynthesis of secondary metabolites	424	2.6536e-32
	ko00940	Phenylpropanoid biosynthesis	88	9.84166e-22
	ko01100	Metabolic pathways	594	1.04478e-18
	ko00943	Isoflavonoid biosynthesis	58	1.81407e-17
	ko00780	Biotin metabolism	24	9.8008e-11
	ko00061	Fatty acid biosynthesis	31	4.43078e-09
	ko01212	Fatty acid metabolism	36	2.59154e-07
	ko00904	Diterpenoid biosynthesis	20	8.3608e-07
	ko00040	Pentose and glucuronate interconversions	43	9.52592e-06
	ko00999	Biosynthesis of various plant secondary metabolites	28	2.81574e-05
	ko04016	MAPK signaling pathway - plant	109	2.83865e-05
	ko00250	Alanine, aspartate and glutamate metabolism	23	0.000191215
	ko00196	Photosynthesis - antenna proteins	10	0.000201805
	ko00910	Nitrogen metabolism	15	0.00046338
	ko04075	Plant hormone signal transduction	148	0.000771326
	ko00950	Isoquinoline alkaloid biosynthesis	12	0.00088332
	ko00592	alpha-Linolenic acid metabolism	21	0.00122
	ko04626	Plant-pathogen interaction	171	0.00139415
	ko00280	Valine, leucine and isoleucine degradation	19	0.00147611
	ko00073	Cutin, suberine and wax biosynthesis	13	0.00366151
CA vs CASi comparison	ko00940	Phenylpropanoid biosynthesis	70	5.13765e-19
	ko00040	Pentose and glucuronate interconversions	51	7.89209e-14
	ko01110	Biosynthesis of secondary metabolites	274	1.27236e-12
	ko00780	Biotin metabolism	21	8.8981e-11
	ko01100	Metabolic pathways	419	4.88646e-10
	ko00943	Isoflavonoid biosynthesis	35	2.16277e-08
	ko00061	Fatty acid biosynthesis	24	1.37415e-07
	ko04626	Plant-pathogen interaction	151	2.27515e-07
	ko00196	Photosynthesis - antenna proteins	12	2.29558e-07
	ko04016	MAPK signaling pathway - plant	92	5.2169e-07
	ko04075	Plant hormone signal transduction	124	8.59845e-06
	ko00999	Biosynthesis of various plant secondary metabolites	24	9.93955e-06
	ko00906	Carotenoid biosynthesis	18	0.000111716
	ko01212	Fatty acid metabolism	24	0.000154089
	ko00592	alpha-Linolenic acid metabolism	19	0.000175212
	ko00910	Nitrogen metabolism	11	0.00298604
	ko00052	Galactose metabolism	18	0.00437701
	ko04141	Protein processing in endoplasmic reticulum	50	0.00448131
	ko00591	Linoleic acid metabolism	8	0.0152173
	ko00073	Cutin, suberine and wax biosynthesis	9	0.0223787
CK vs CASi comparison	ko01110	Biosynthesis of secondary metabolites	229	2.58082e-25
	ko01100	Metabolic pathways	309	5.59535e-16
	ko00943	Isoflavonoid biosynthesis	33	4.70192e-12
	ko00940	Phenylpropanoid biosynthesis	41	5.41248e-10
	ko00999	Biosynthesis of various plant secondary metabolites	22	8.88223e-08
	ko00910	Nitrogen metabolism	13	2.88744e-06
	ko00040	Pentose and glucuronate interconversions	27	5.12707e-06
	ko04626	Plant-pathogen interaction	100	1.29848e-05
	ko00250	Alanine, aspartate and glutamate metabolism	16	3.11063e-05
	ko04016	MAPK signaling pathway - plant	60	5.08442e-05
	ko00460	Cyanoamino acid metabolism	12	7.41346e-05
	ko00130	Ubiquinone and other terpenoid-quinone biosynthesis	13	0.000225572
	ko00966	Glucosinolate biosynthesis	5	0.000804847
	ko00950	Isoquinoline alkaloid biosynthesis	8	0.000921805
	ko00500	Starch and sucrose metabolism	31	0.0017759
	ko00270	Cysteine and methionine metabolism	20	0.0022654
	ko00350	Tyrosine metabolism	10	0.00413327
	ko00591	Linoleic acid metabolism	7	0.00504597
	ko00902	Monoterpenoid biosynthesis	3	0.00645142
	ko00904	Diterpenoid biosynthesis	8	0.00700745

## Sheet: Table.S7
Table S7. List of significant pathways identified by KEGG enrichments analysis of the annotated DEGs among three treatments.（7d)
	ID	Pathway	Number	p-Value
CK vs CA comparison	ko04016	MAPK signaling pathway - plant	96	6.17315e-17
	ko04075	Plant hormone signal transduction	119	1.46594e-13
	ko04626	Plant-pathogen interaction	130	5.90931e-12
	ko01110	Biosynthesis of secondary metabolites	180	3.12385e-06
	ko00999	Biosynthesis of various plant secondary metabolites	19	2.0185e-05
	ko00940	Phenylpropanoid biosynthesis	33	2.2514e-05
	ko00270	Cysteine and methionine metabolism	24	0.000204425
	ko00290	Valine, leucine and isoleucine biosynthesis	8	0.000637345
	ko00073	Cutin, suberine and wax biosynthesis	10	0.000665523
	ko00906	Carotenoid biosynthesis	13	0.000895902
	ko00040	Pentose and glucuronate interconversions	19	0.0178517
	ko00592	alpha-Linolenic acid metabolism	11	0.0179704
	ko00460	Cyanoamino acid metabolism	8	0.0222791
	ko00950	Isoquinoline alkaloid biosynthesis	6	0.0232688
	ko00591	Linoleic acid metabolism	6	0.0271582
	ko00910	Nitrogen metabolism	7	0.0293152
	ko00400	Phenylalanine, tyrosine and tryptophan biosynthesis	8	0.0372477
	ko00500	Starch and sucrose metabolism	27	0.0475218
	ko00195	Photosynthesis	10	0.0487529
	ko00966	Glucosinolate biosynthesis	3	0.0488843
CA vs CASi comparison	ko00195	Photosynthesis	44	9.7081e-34
	ko00196	Photosynthesis - antenna proteins	17	1.9041e-17
	ko01100	Metabolic pathways	254	7.50625e-15
	ko01110	Biosynthesis of secondary metabolites	162	2.15798e-12
	ko00910	Nitrogen metabolism	13	2.49357e-07
	ko00999	Biosynthesis of various plant secondary metabolites	17	4.91853e-06
	ko00270	Cysteine and methionine metabolism	23	5.12908e-06
	ko00290	Valine, leucine and isoleucine biosynthesis	9	1.09816e-05
	ko00940	Phenylpropanoid biosynthesis	26	6.06951e-05
	ko00860	Porphyrin metabolism	12	0.000156519
	ko01210	2-Oxocarboxylic acid metabolism	10	0.0028524
	ko00966	Glucosinolate biosynthesis	4	0.00297003
	ko00943	Isoflavonoid biosynthesis	14	0.00566445
	ko00906	Carotenoid biosynthesis	9	0.00850845
	ko00710	Carbon fixation in photosynthetic organisms	10	0.00926079
	ko00945	Stilbenoid, diarylheptanoid and gingerol biosynthesis	6	0.0137874
	ko00630	Glyoxylate and dicarboxylate metabolism	10	0.0215997
	ko00460	Cyanoamino acid metabolism	6	0.0430331
	ko00073	Cutin, suberine and wax biosynthesis	5	0.0666365
	ko04016	MAPK signaling pathway - plant	37	0.0673802
CK vs CASi comparison	ko04016	MAPK signaling pathway - plant	85	7.92471e-18
	ko04075	Plant hormone signal transduction	101	2.55989e-13
	ko00943	Isoflavonoid biosynthesis	28	3.97458e-10
	ko00940	Phenylpropanoid biosynthesis	37	1.44201e-09
	ko01110	Biosynthesis of secondary metabolites	156	7.01473e-08
	ko00196	Photosynthesis - antenna proteins	10	8.66664e-08
	ko04626	Plant-pathogen interaction	95	4.27557e-07
	ko00592	alpha-Linolenic acid metabolism	13	0.000345168
	ko04141	Protein processing in endoplasmic reticulum	32	0.00380702
	ko00941	Flavonoid biosynthesis	12	0.00653369
	ko00591	Linoleic acid metabolism	6	0.0100377
	ko00999	Biosynthesis of various plant secondary metabolites	11	0.0133729
	ko00906	Carotenoid biosynthesis	9	0.013681
	ko00945	Stilbenoid, diarylheptanoid and gingerol biosynthesis	6	0.0195234
	ko00966	Glucosinolate biosynthesis	3	0.0277824
	ko00073	Cutin, suberine and wax biosynthesis	6	0.0301706
	ko00195	Photosynthesis	9	0.0322225
	ko00902	Monoterpenoid biosynthesis	2	0.0459176
	ko00270	Cysteine and methionine metabolism	14	0.0504208
	ko00640	Propanoate metabolism	5	0.148539

## Sheet: Table.S8
Table S8. Statistics of the number of transcription factors corresponding to each transcription factor family
Treatment 2d				Treatment 7d
CK vs CA		CA vs CASi		CK vs CA		CA vs CASi
Transcription factor Families	Gene number	Transcription factor Families	Gene number	Transcription factor Families	Gene number	Transcription factor Families	Gene number
AP2/ERF-ERF	49	AP2/ERF-ERF	41	AP2/ERF-AP2	1	AP2/ERF-AP2	1
AP2/ERF-RAV	2	AP2/ERF-RAV	1	AP2/ERF-RAV	1	AP2/ERF-RAV	1
AUX/IAA	7	AUX/IAA	6	AP2/ERF-ERF	44	AP2/ERF-ERF	20
ARID	1	ARID	1	AUX/IAA	6	AUX/IAA	3
B3-ARF	3	B3	2	B3	1	B3	1
B3	6	B3-ARF	1	bHLH	16	bHLH	5
bHLH	19	bHLH	23	bZIP	2	bZIP	4
bZIP	11	bZIP	8	C2C2-Dof	1	C2C2-CO-like	2
Coactivator	1	C2H2	13	C2C2-GATA	3	C3H	2
C2C2-Dof	1	C2C2-Dof	1	C2H2	16	C2C2-GATA	1
C2C2-GATA	5	C2C2-GATA	4	C3H	4	C2H2	4
C3H	7	C3H	4	GNAT	3	FAR1	1
C2H2	25	Coactivator p15	1	GRAS	12	GRAS	1
DBP	1	DBP	1	GRF	1	GARP-G2-like	3
GNAT	2	GARP-G2-like	5	HB-BELL	3	HRT	1
GARP-G2-like	11	GRAS	9	HB-HD-ZIP	2	HSF	2
GRAS	18	GRF	1	HSF	2	LOB	1
GRF	2	HB-KNOX	2	HB-WOX	1	MYB	12
HB-BELL	1	HB-other	2	HB-KNOX	1	MYB-related	4
HB-HD-ZIP	8	HB-WOX	4	HRT	1	MADS-MIKC	6
HB-WOX	6	HB-HD-ZIP	3	LOB	7	mTERF	2
HB-other	2	HSF	2	MADS-MIKC	6	MADS-M-type	2
HSF	7	LOB	6	MYB	16	NAC	2
HB-KNOX	1	MADS-MIKC	5	MYB-related	6	other	3
LIM	2	MADS-M-type	2	NAC	17	OFP	1
LOB	12	MYB	35	NF-YB	1	RWP-PK	3
MADS-MIKC	6	MYB-related	6	other	6	Rcd1-like	1
MYB	51	NAC	15	OFP	4	SBP	2
MYB-related	8	NF-YA	3	pseudo	1	Trihelix	2
NAC	29	NF-YB	1	RWP-RK	4	Tify	2
NF-YA	1	other	5	Rcd1-like	1	WRKY	16
NF-YB	4	OFP	2	Tify	9	zf-HD	1
other	6	PLATZ	4	Trihelix	5
OFP	4	RWP-RK	1	WRKY	22
PLATZ	4	SNF2	1	zf-HD	2
RWP-RK	4	SBP	1
SBP	3	SRS	3
SNF2	1	TCP	1
SET	1	Tify	5
SRS	4	TRAF	2
TAZ	1	WRKY	21
TRAF	2	zf-HD	2
Trihelix	2
TCP	2
WRKY	22
zf-HD	6
